# Supplementary material for: Losartan Interactions with 2-Hydroxypropyl-β-CD
Source: MDPI journal article supplement (doi:10.3390/molecules27082421), 2022-04-08
Supplement: s1 [file s1]

## SUPPLEMENTARY MATERIAL

### Losartan interactions with 2-hydroxypropyl- $\beta$ -CD

**Vasiliki Palli <sup>1</sup>, Georgios Leonis <sup>1</sup>, Nikoletta Zoupanou <sup>1</sup>, Nikitas Georgiou <sup>1</sup>, Maria Chountoulesi <sup>2</sup>, Nikolaos Naziris <sup>2,3</sup>, Demeter Tzeli <sup>1,4</sup>, Costas Demetzos <sup>2</sup>, Georgia Valsami <sup>2,\*</sup>, Konstantinos D. Marousis <sup>5</sup>, Georgios A. Spyroulias <sup>5</sup> and Thomas Mavromoustakos <sup>1,\*</sup>**

<sup>1</sup>Department of Chemistry, School of Sciences, National and Kapodistrian University of Athens, Zografou, 15784, Greece

<sup>2</sup>Department of Pharmacy, School of Health, Sciences, National and Kapodistrian University of Athens, Zografou 15784, Greece

<sup>3</sup>Department of General Biophysics, Faculty of Biology and Environmental Protection, University of Lodz, Pomorska 141/143, Lodz 90-236, Poland

Department of Pharmacy, University of Patras, 26504 Patras, Greece

<sup>4</sup>Theoretical and Physical Chemistry Institute, National Hellenic Research Foundation, 48 Vassileos Constantinou Ave., Athens 116 35, Greece

<sup>5</sup> Department of Pharmacy, University of Patras, 26504 Patras, Greece

\*Correspondence: tmavrom@chem.uoa.gr; valsami@pharm.uoa.gr

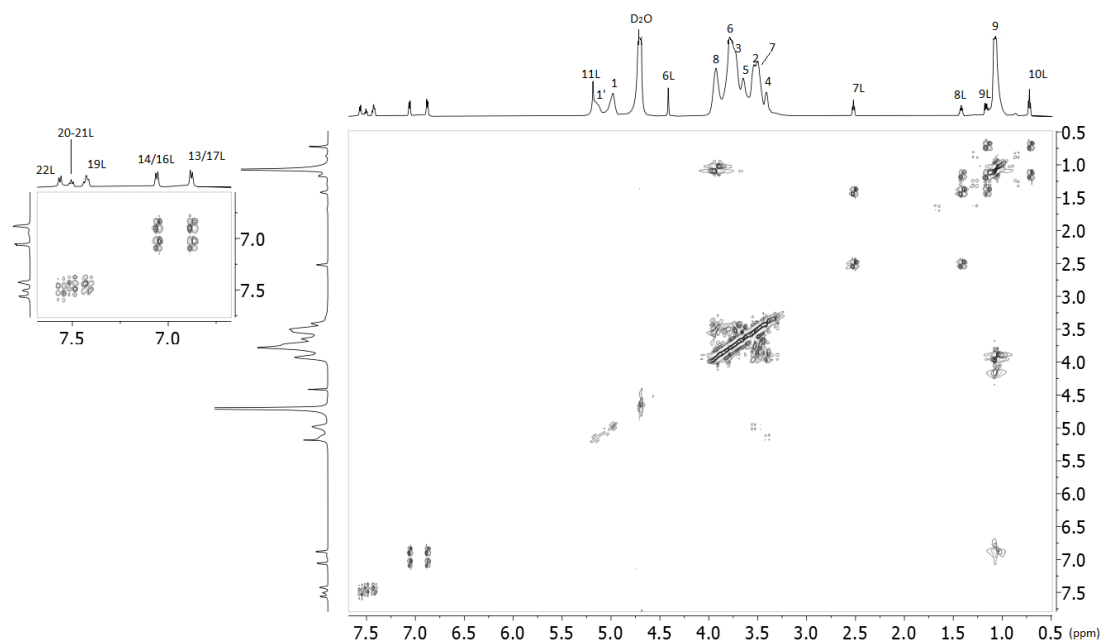

**Figure S1.** 2D COSY NMR spectra of losartan and 2-hp- $\beta$ -CD complex obtained with 700 MHz Bruker spectrometer using D<sub>2</sub>O solvent and at 25 °C.

**Figure S2.** 2D COSY NMR spectra of losartan with 700 MHz Bruker spectrometer using D<sub>2</sub>O solvent and at 25°C

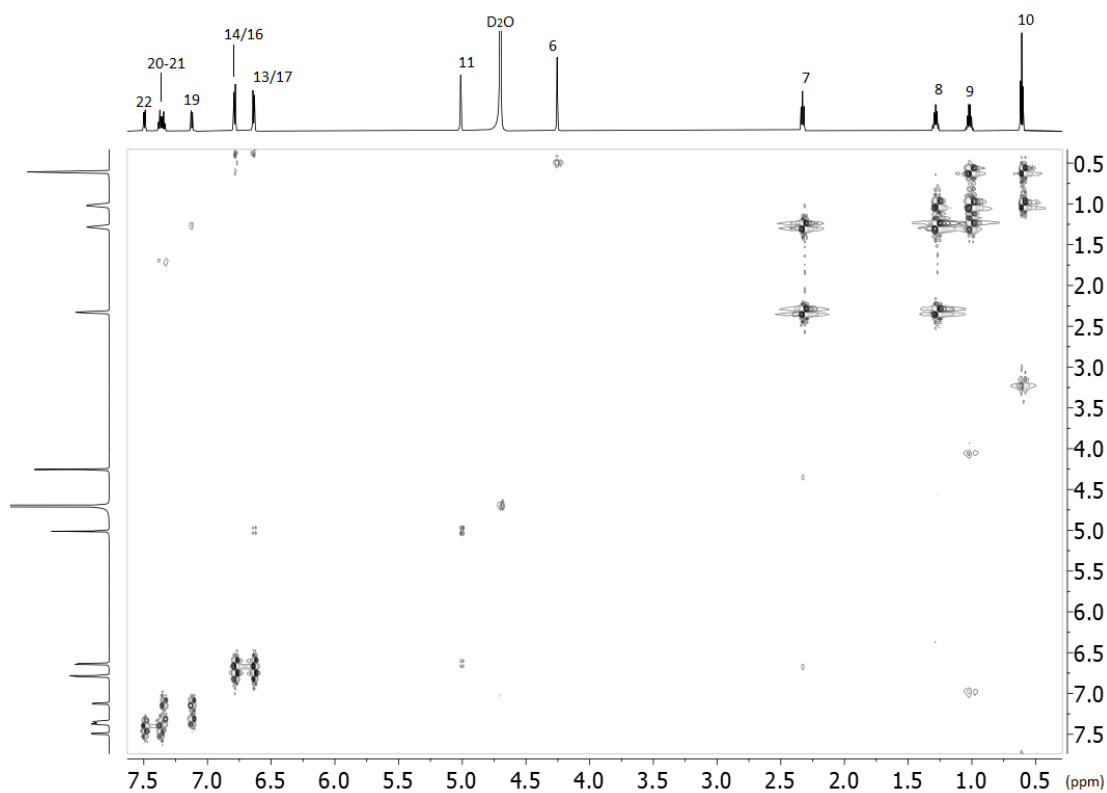

**Figure S2.** 2D COSY NMR spectra of losartan with 700 MHz Bruker spectrometer using D<sub>2</sub>O solvent and at 25 °C.

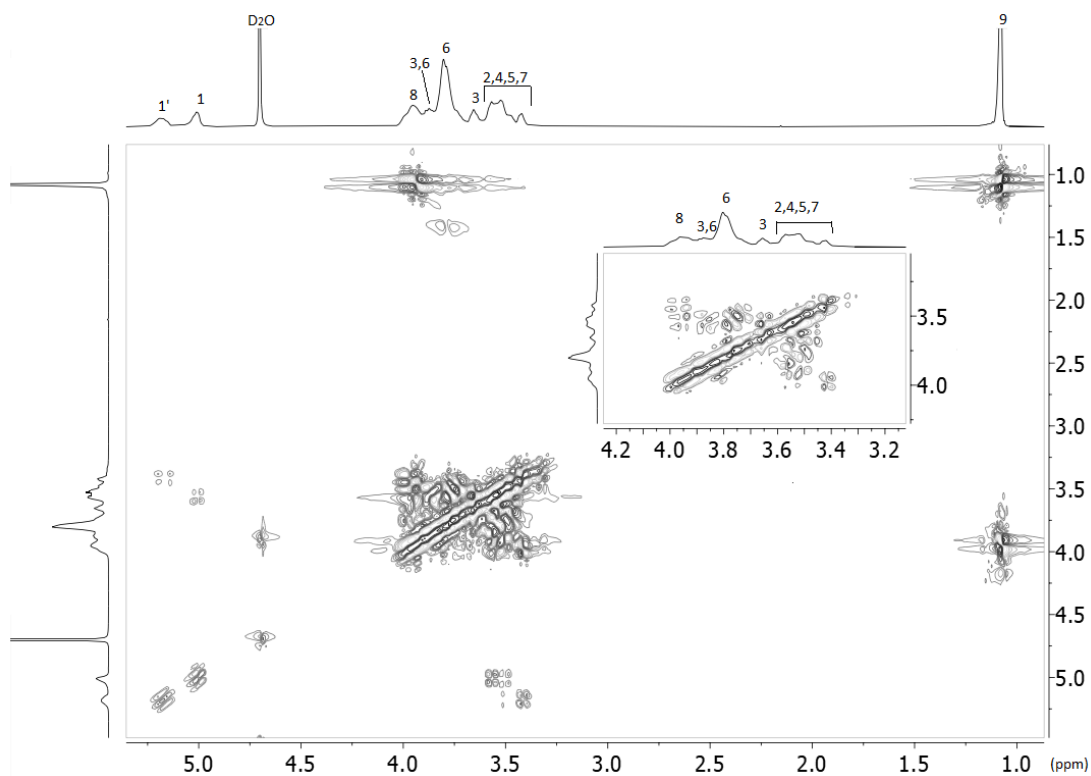

**Figure S3.** 2D COSY NMR spectra of losartan obtained with 700 MHz Bruker spectrometer using D<sub>2</sub>O solvent and at 25 °C.

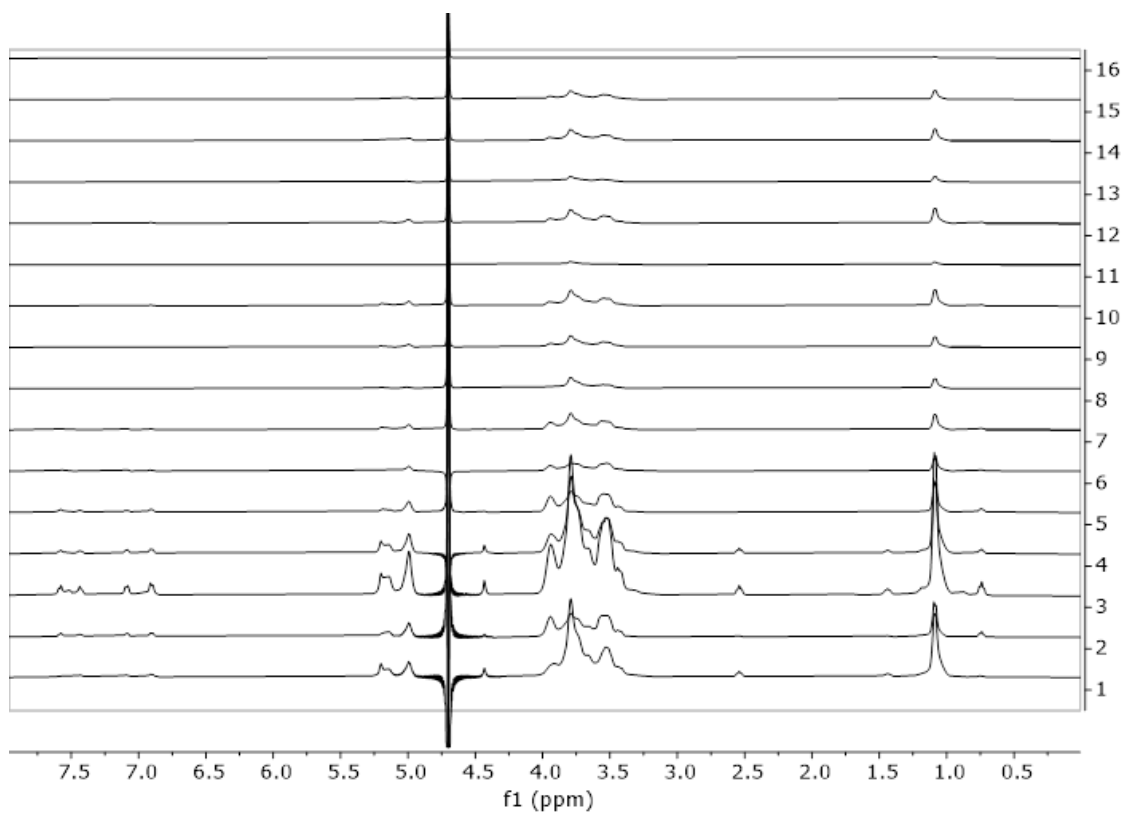

**Figure S4.** Relaxation time of losartan and 2-hp-β-CD complex.

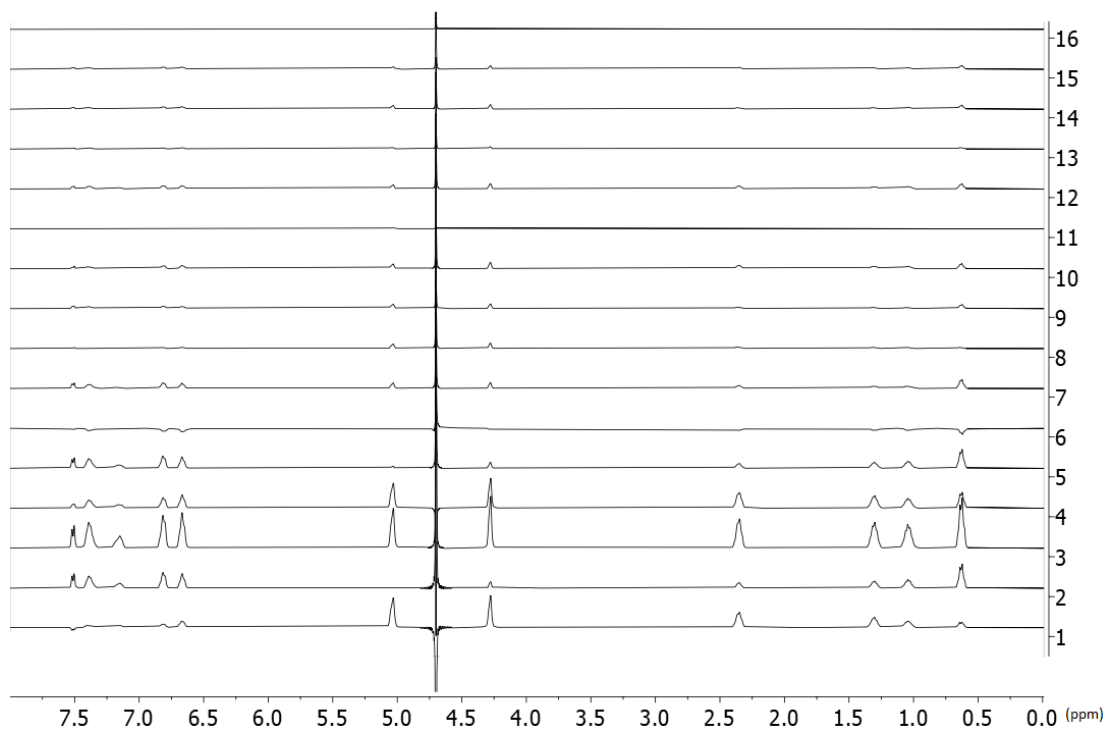

**Figure S5.** Relaxation time of losartan.

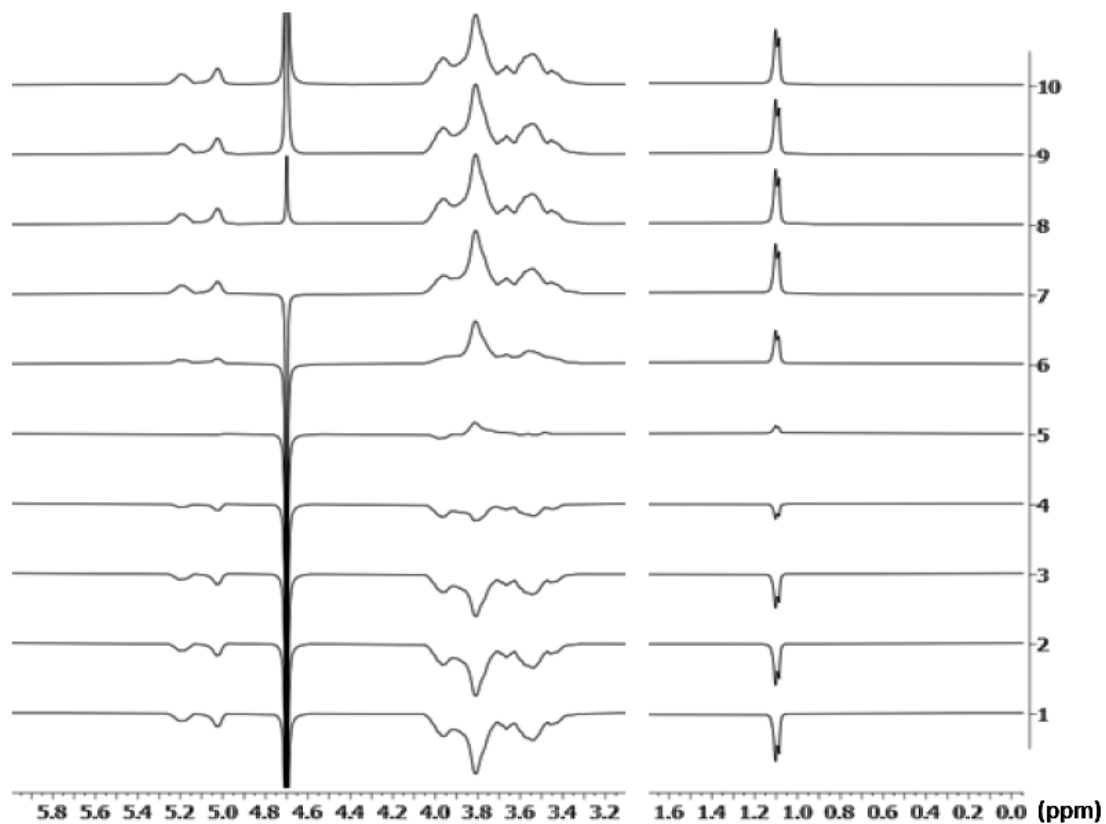

**Figure S6.** Relaxation time of 2-hp- $\beta$ -CD.

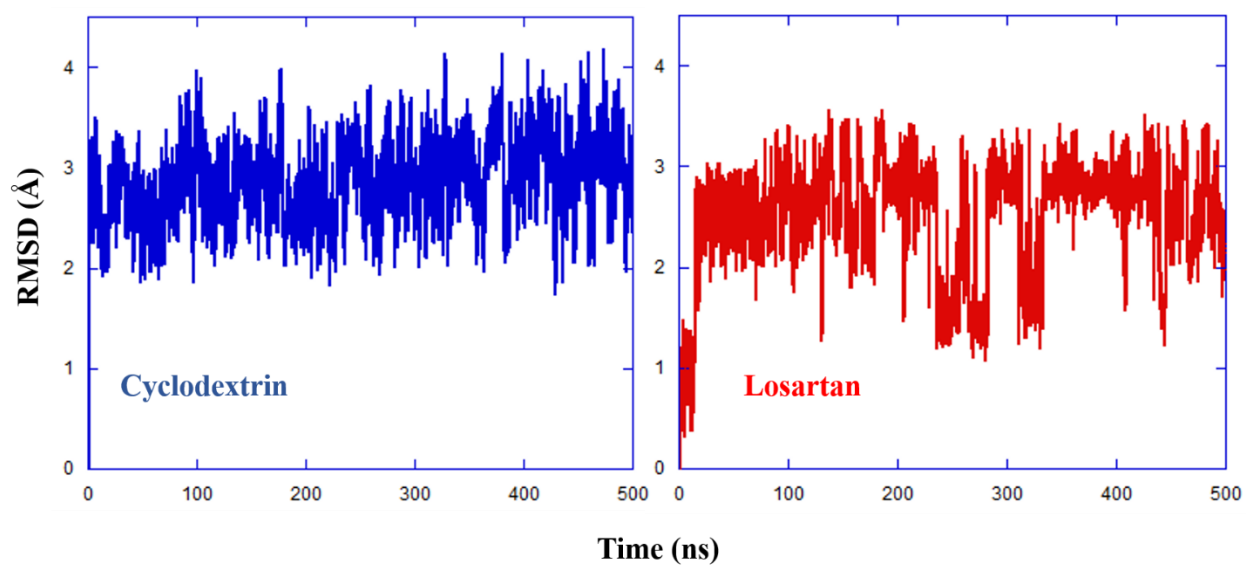

**Figure S7.** Root mean square deviations (RMSD) of cyclodextrin (2-HP- $\beta$ -CD) and losartan in the inclusion complex.
